# Supplementary material for: Enzymatically synthesized poly(amino-co-ester) polyplexes for systemic delivery of pcDNA-miRNA-214 to suppress colorectal cancer liver metastasis
Source: Royal Society of Chemistry journal article supplement (doi:10.1039/c8tb01932k), 2018-01-01
Supplement: c8tb01932k1.pdf [file c8tb01932k1.pdf]

## Supplementary Information

---

# Enzymatically Synthesized Poly(amino-co-ester) Polyplexes for Systemic Delivery of pcDNA-miRNA-214 to Suppress Colorectal Cancer Liver Metastasis

Hui-yan Luo<sup>a,b,1</sup>, Zhe Yang<sup>b,d,e,1</sup>, Wei Wei<sup>c,1</sup>, Ying-qin Li<sup>b</sup>, Hengying Pu<sup>a</sup>, Ya Chen<sup>a,b</sup>,  
Hui Sheng<sup>a</sup>, Jie Liu<sup>b\*</sup>, Rui-hua Xu<sup>a\*</sup>

<sup>a</sup> Department of Medical Oncology, Sun Yat-sen University Cancer Center; State Key Laboratory of Oncology in South China; Collaborative Innovation Center for Cancer Medicine, Guangzhou 510060, China

<sup>b</sup> Department of Biomedical Engineering, School of Engineering, Sun Yat-sen University, Guangzhou, 510006, China

<sup>c</sup> Department of Hepatobiliary Oncology, Sun Yat-sen University Cancer Center; State Key Laboratory of Oncology in South China; Collaborative Innovation Center for Cancer Medicine, Guangzhou 510060, China

<sup>d</sup> The Key Laboratory of Biomedical Information Engineering of Ministry of Education, School of Life Science and Technology, Xi'an Jiaotong University, Xi'an, 710049, China

<sup>e</sup> Department of Ophthalmology, University of California, San Diego, La Jolla, California 92093, USA

<sup>1</sup> These authors contribute equally to this work.

\* To whom correspondence may be addressed. E-mail: liujie56@mail.sysu.edu.cn or xurh@sysucc.org.cn

## Supplementary Information

Figure S1

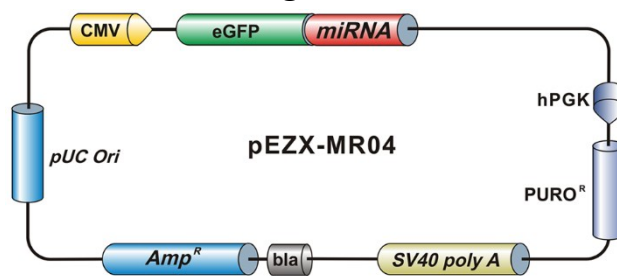

Figure S1. Construction of pcDNA-miRNA-214.

## Supplementary Information

Figure S2

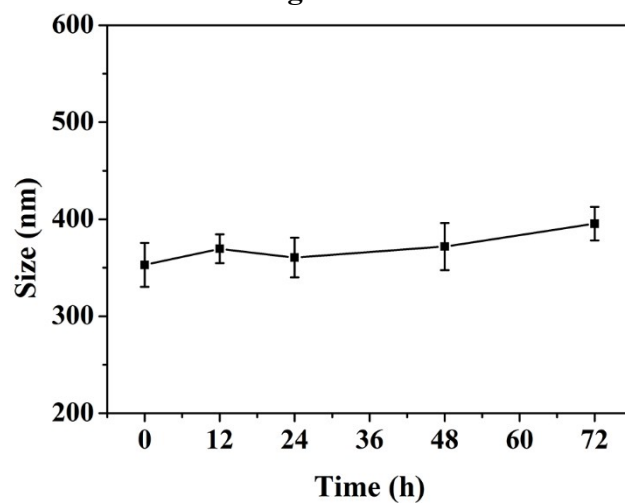

**Figure S2.** Stability of the quaternary polyplexes in PBS (pH 7.4, 0.01 M) containing 10% FBS (v/v). Data are given as the mean  $\pm$  SD (n = 3)

## Supplementary Information

Figure S3

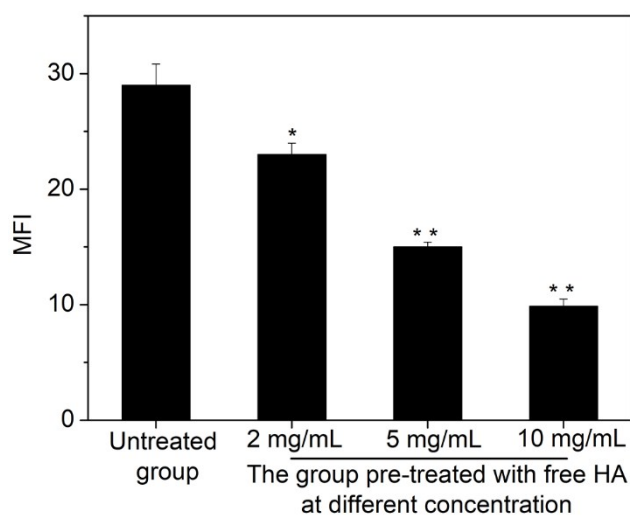

**Figure S3.** Flow cytometry analysis results of HCT116 cells treated with fluorescence-labeled quaternary polyplexes after the cells were pretreated with HA (25 kDa) at different concentration (2, 5, 10 mg/mL). \* and \*\* represent that there exist the significant or extremely significant difference between the untreated group and the group pre-treated with free HA at different concentration. Data are given as the mean $\pm$  SD (n = 3)

## Supplementary Information

---

Figure S4

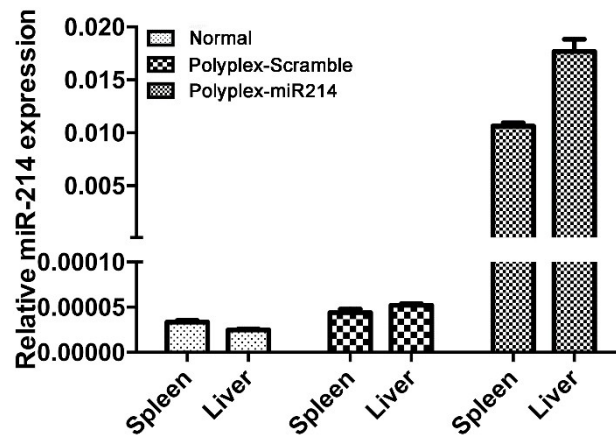

**Figure S4.** The miR-214 expression level of the spleen and liver after the treatment of saline, polyplex-scramble and polyplex-miR214. Data are given as the mean $\pm$  SD (n = 6).

**Figure S5**

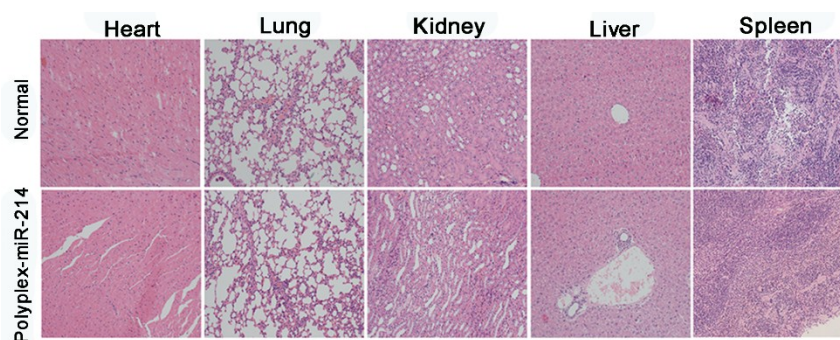

**Figure S5.** H&E staining of vital organs showed biological compatibility and organ specific safety of the quaternary polyplexes.
